# Supplementary material
Source: PubMed Central journal article supplement (PMC4715924)
Supplement: NIHMS745859-supplement.pdf [file NIHMS745859-supplement.pdf]

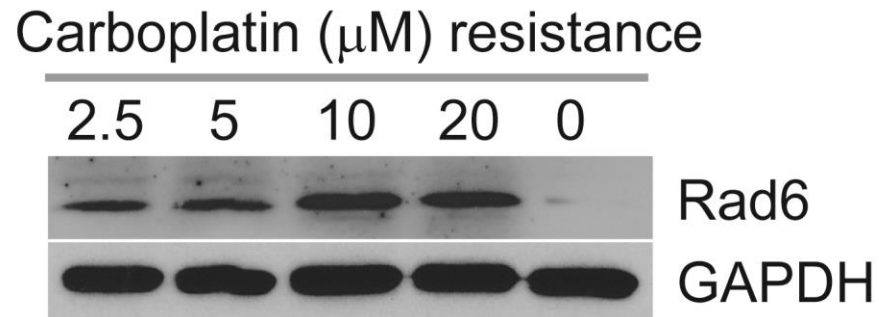

**Fig. S1.** Rad6 protein levels correlate with increasing carboplatin resistance. A series of increasingly carboplatin-resistant sublines of the ovarian cancer cell line, SKOV3 were generated by selecting the cells with intermittent and increased concentration of carboplatin exposure for several months. Total protein was isolated from the parent and 4 increasingly-resistant cell lines and Rad6 was visualized by Western blot.

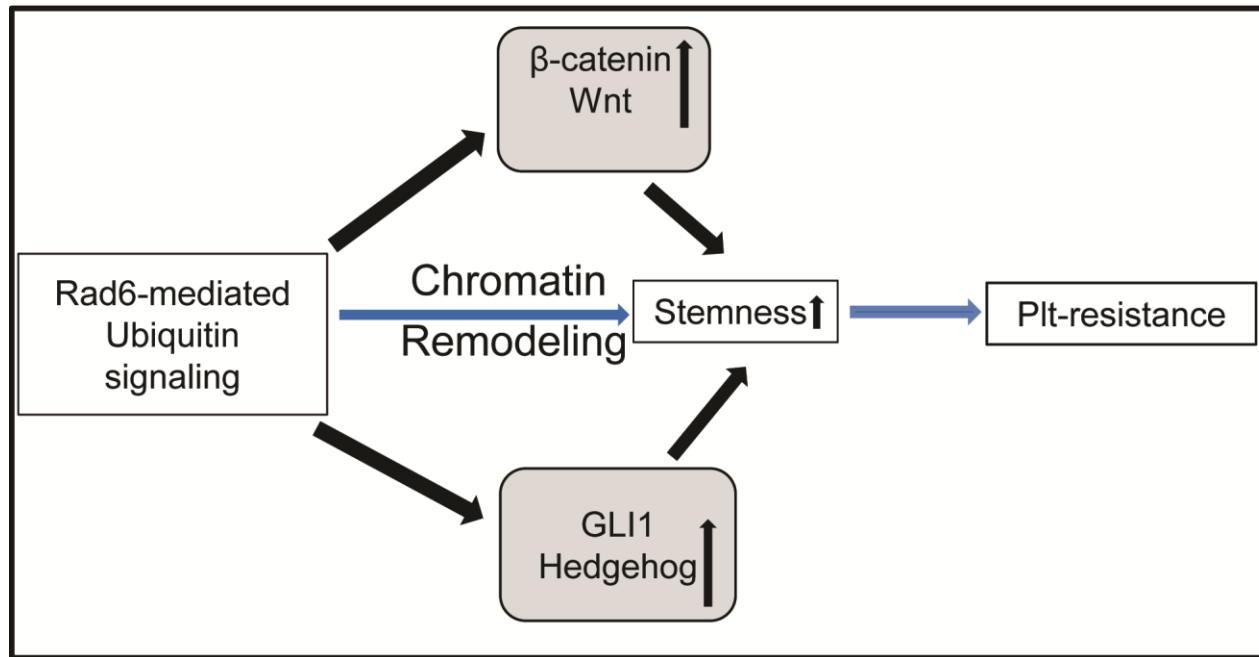

**Fig. S2.** Hypothetical Model for Rad6 upregulation mediated stemness and platinum drug resistance OC. Increased expression of Rad6 in OC leads to enhancement of the Wnt pathway due to stabilization of  $\beta$ -catenin, chromatin remodeling through histone modification, and increased Hedgehog pathway activity due to higher Gli1 levels. Each of these three changes enhance expression of proteins that promote stemness and tumor cell resistance to the platinum-based chemotherapeutic drugs such as carboplatin.
